# Supplementary material for: Quantitative Proteomic and Phosphoproteomic Profiling of Lung Tissues from Pulmonary Arterial Hypertension Rat Model
Source: MDPI journal article supplement (doi:10.3390/ijms24119629), 2023-06-01
Supplement: s1 [file s1]

a

|                     | Week 1 | Week 2 | Week 3 | Week 4 | Total |
|---------------------|--------|--------|--------|--------|-------|
| Proteins identified | 5560   | 5496   | 5907   | 5547   | 6901  |
| Proteins quantified | 5398   | 5290   | 5737   | 5378   | 6759  |

b

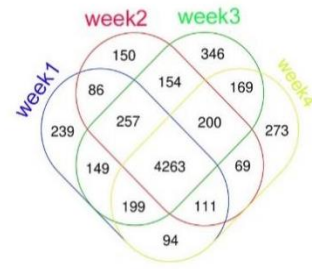

**Supplementary Figure S1. Summary of protein numbers in proteomic profiling of lung tissues of MCT-treated rats and the control rats. a** Table summarizing the numbers of proteins identified and quantified. **b** Venn diagram showing the protein numbers across four groups.

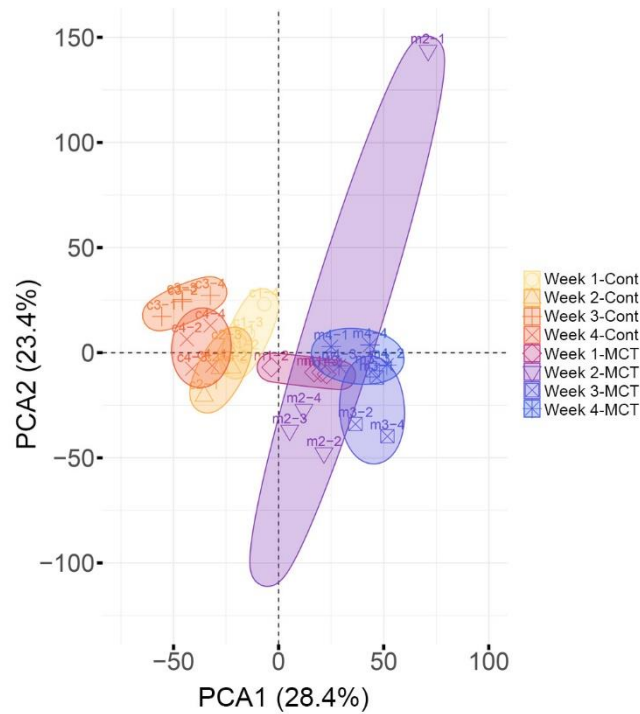

**Supplementary Figure S2. Principal component analysis (PCA) of protein abundances for all biological replicates of control (Cont) and MCT treated samples**

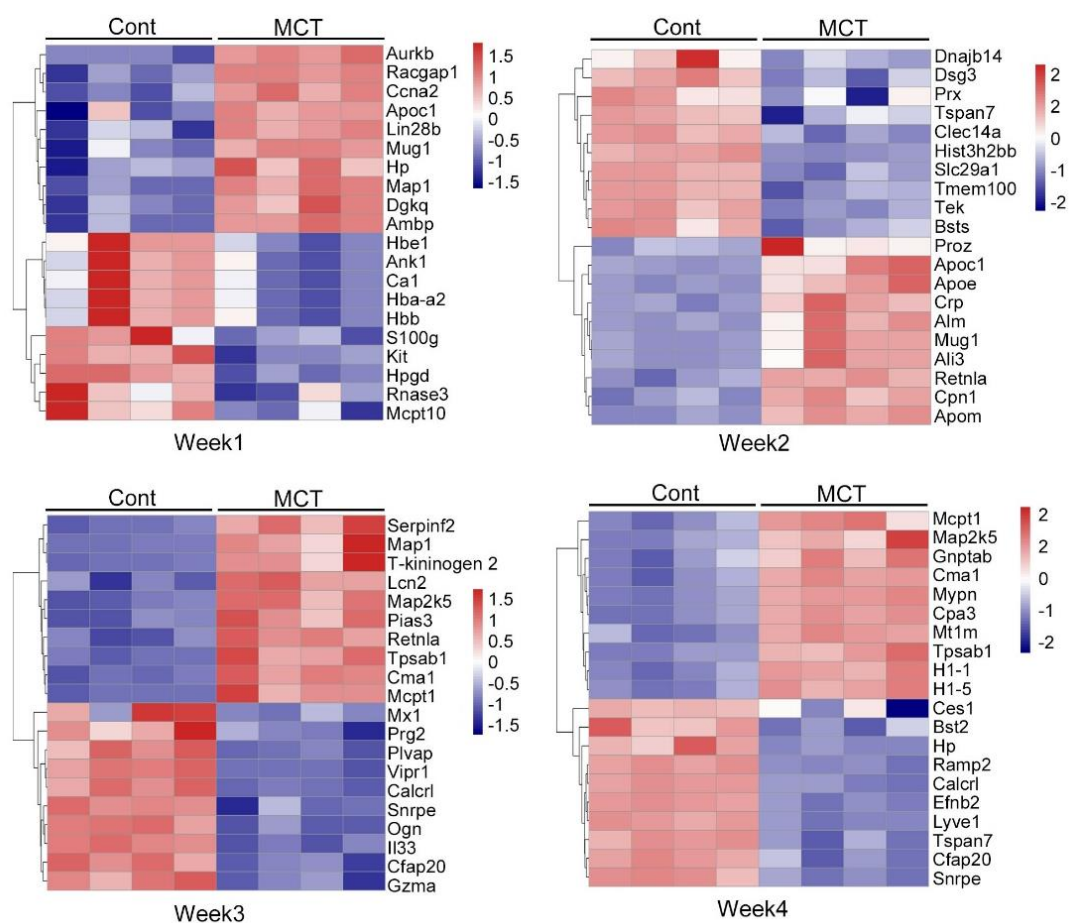

**Supplementary Figure S3. Heatmaps showing the top-10 changed proteins in each group. Uncharacterized proteins were removed.**

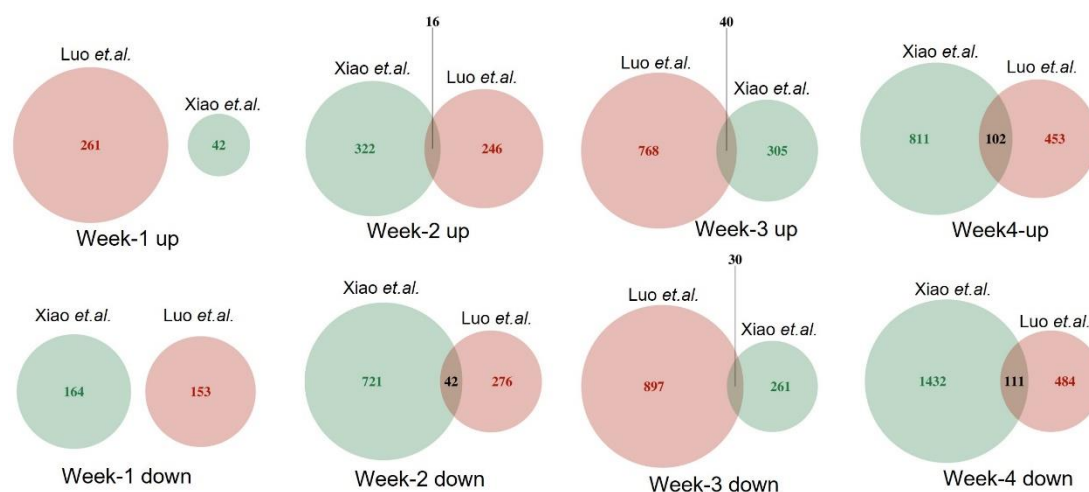

**Supplementary Figure S4. Comparison of significantly changed genes or proteins identified by this study (*Luo et. al.*) and *Xiao et. al.***

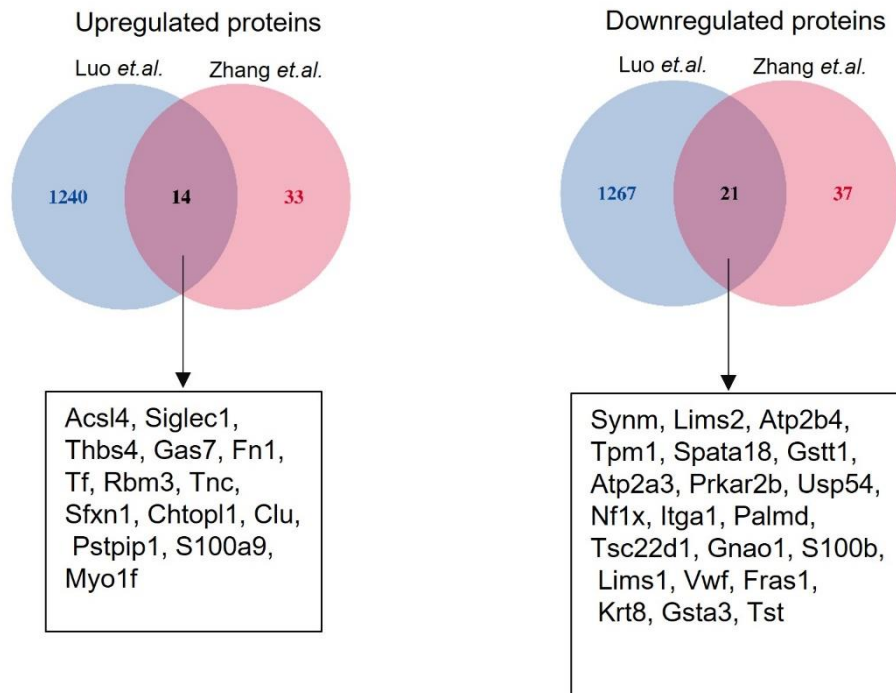

**Supplementary Figure S5. Comparison of significantly changed proteins identified by this study (*Luo et al.*) and Zhang *et al.*** All the significantly upregulated proteins or downregulated proteins identified in week 1,2,3 and 4 were pooled and compared with the data of Zhang *et al.*

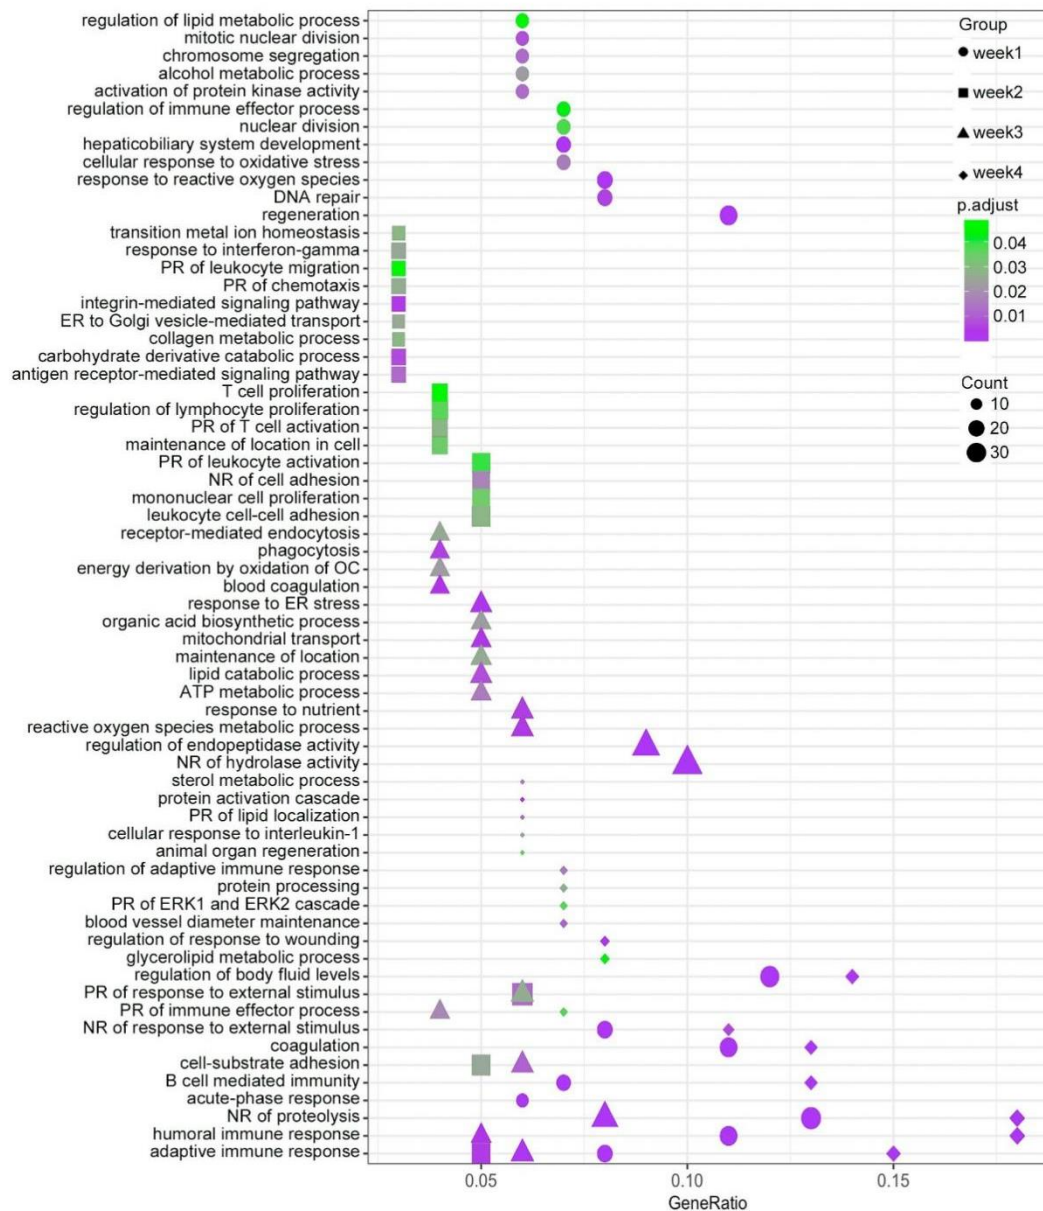

**Supplementary Figure S6. GO (biological process) analysis of the proteins significantly upregulated in MCT samples comparing to control samples.** For each group of data, top-20 terms were shown based on gene count. PR is short for positive regulation, and NR is short for negative regulation.

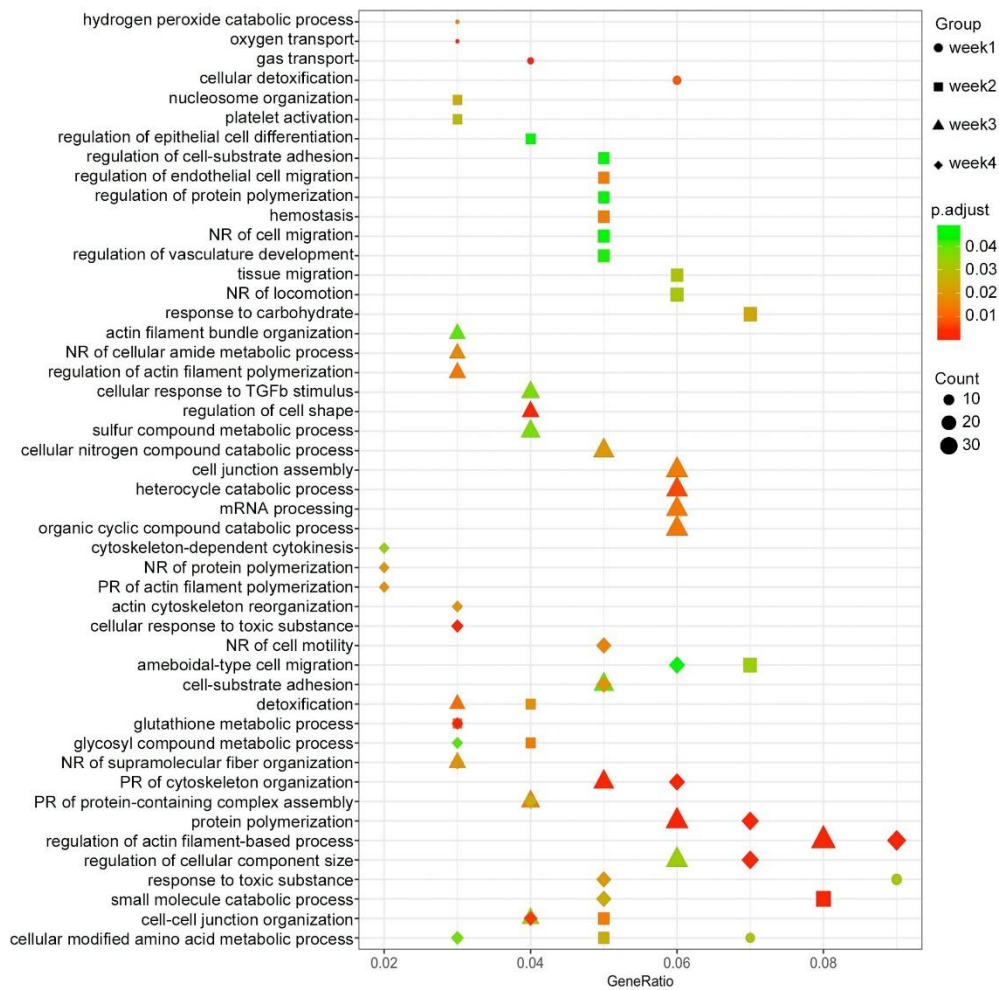

**Supplementary Figure S7. GO (biological process) analysis of the proteins significantly downregulated in MCT samples comparing to control samples.** For each group of data, top-15 terms were shown based on gene count. PR is short for positive regulation, and NR is short for negative regulation.



a

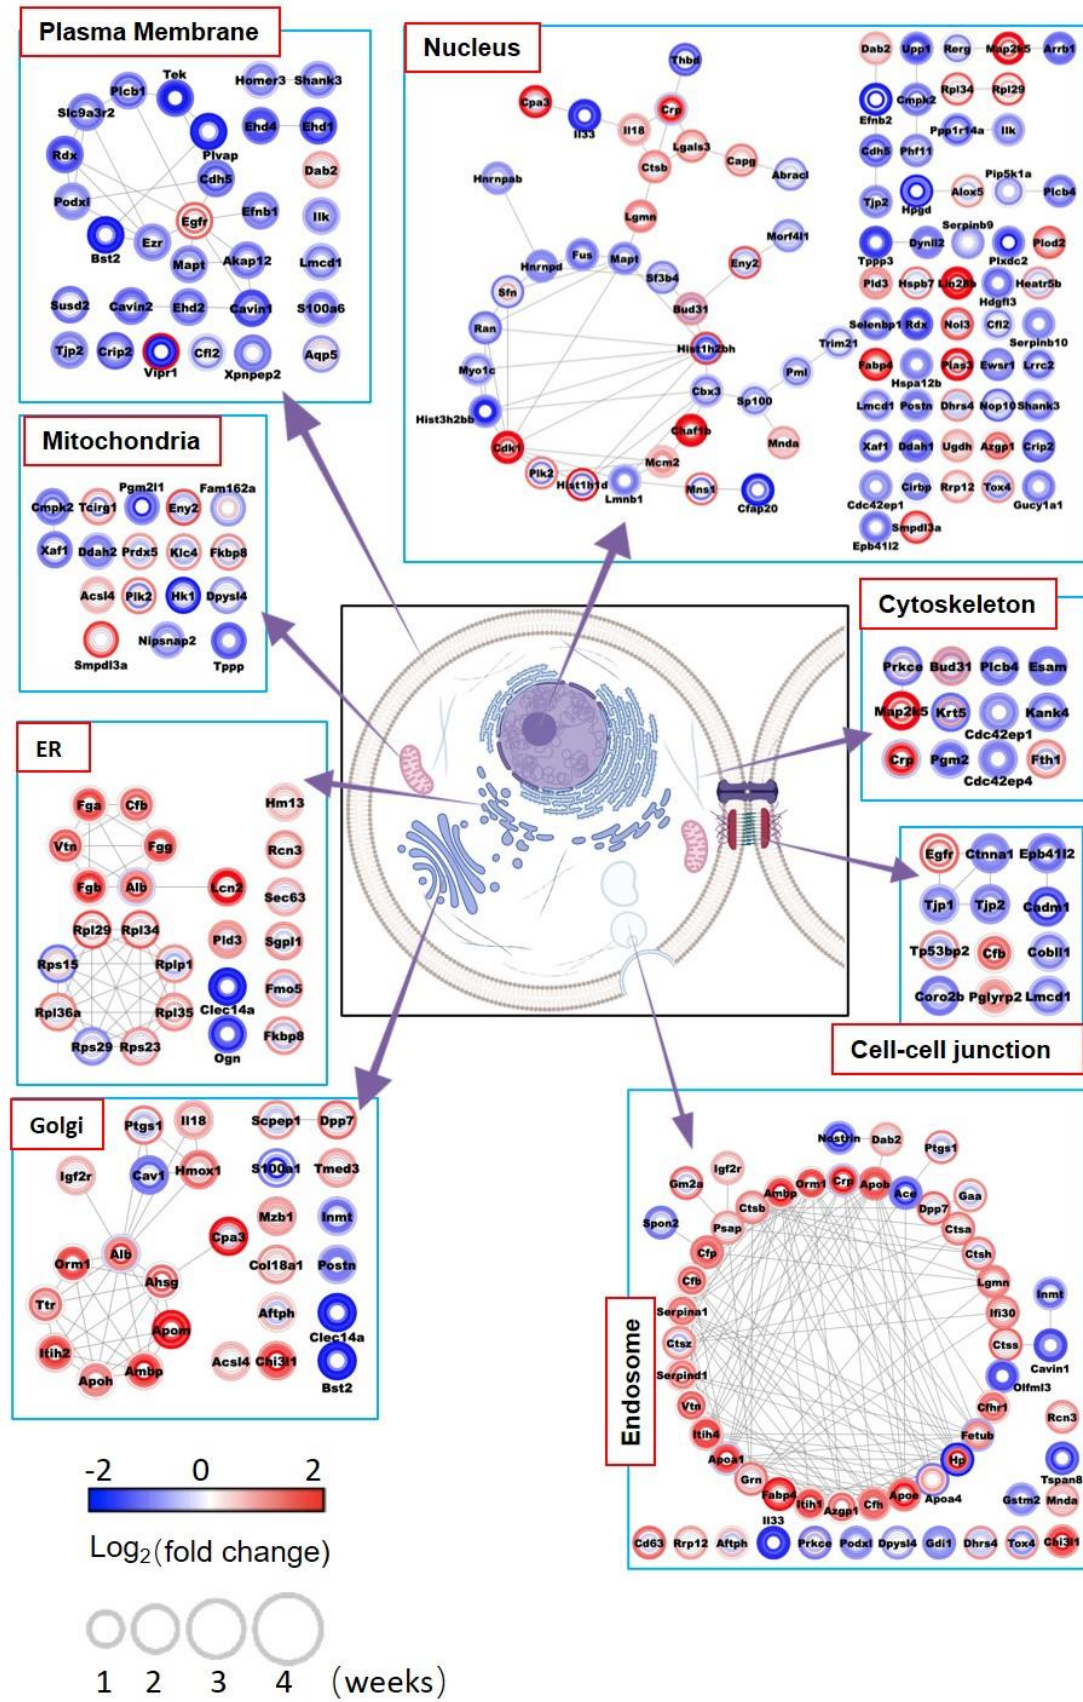



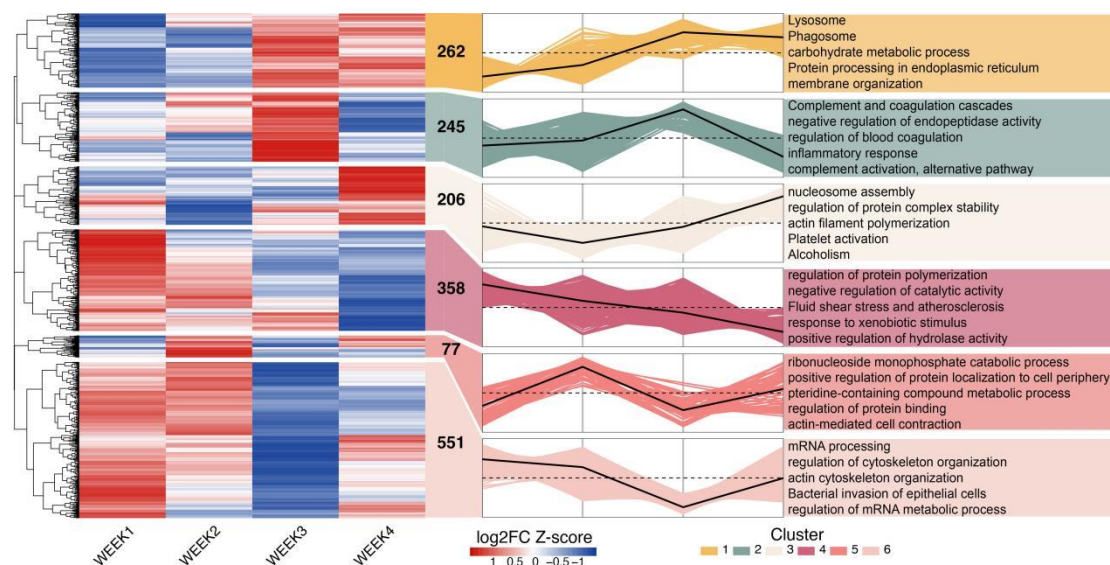

**Supplementary Figure S9. Hierarchical clustering of fold changes and pathway analysis of significantly changed proteins in proteomic profiling of lung tissues from MCT model rats.** Proteins significantly changed ( $\text{abs}(\log_2(\text{fold change})) > \log_2(1.2)$ ,  $P < 0.05$ ) in at least one group are included. Number of proteins within each cluster, fold change profiles and selected pathways are shown.

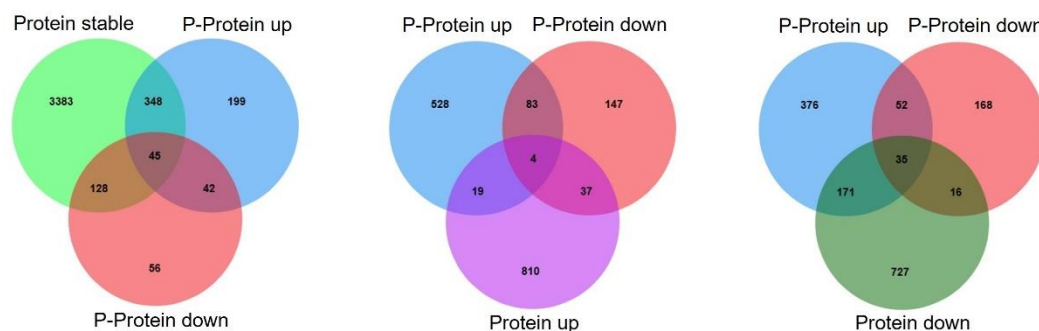

**Supplementary Figure S10. Venn diagrams showing the associations between significantly changed phosphoproteins (P-Protein) and proteins quantified in lung tissue from rats treated with MCT for 3 weeks.**
